# Supplementary material for: The holocentric chromosome microevolution: From phylogeographic patterns to genomic associations with environmental gradients
Source: PubMed Central journal article supplement (PMC11628669; doi:10.1111/mec.17156), 2023-10-05
Supplement: MEC-33-e17156-s004.pdf [file MEC-33-e17156-s004.pdf]

100/100

100/100

100/100

98.3/27

100/100

99.9/90

71.9/81

100/100

100/94

35.5/62

98.8/67

35.2/59

73.6/64

36.4/65

85.9/90

100/100

73.2/88

100/100

99.9/95

89.6/88

99.6/99

99.8/93

100/100

99.9/96

12.7/80

92.5/95

78/100

100/100

100/100

98.8/98

100/100

100/100

100/100

100/100

100/100

100/100

100/100

100/100

100/100

100/100

100/100

100/100

100/100

100/100

100/100

100/100

100/100

100/100

100/100

100/100

100/100

100/100

100/100

100/100

100/100

100/100

100/100

100/100

100/100

100/100

100/100

100/100

100/100

100/100

100/100

100/100

100/100

100/100

100/100

100/100

100/100

100/100

100/100

100/100

100/100

100/100

100/100

100/100

100/100

100/100

100/100

100/100

100/100

100/100

100/100

100/100

100/100
