# Supplementary material for: The holocentric chromosome microevolution: From phylogeographic patterns to genomic associations with environmental gradients
Source: PubMed Central journal article supplement (PMC11628669; doi:10.1111/mec.17156), 2023-10-05

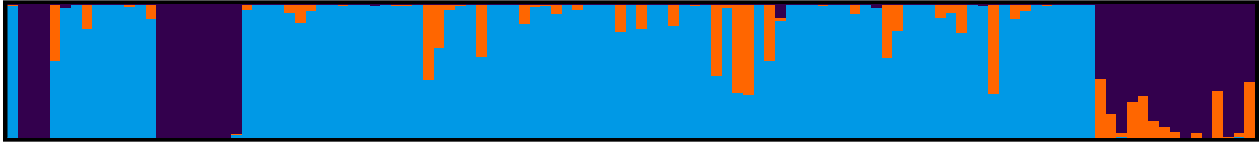

Supplement: MEC-33-e17156-s008.pdf [file MEC-33-e17156-s008.pdf]
